# Supplementary material for: Study of surgical site infection in children undergoing major surgery: a cross- sectional study
Source: Research Square preprint supplement (doi:10.21203/rs.3.rs-7562691/v1), 2025-10-23
Supplement: Supplementary file 1 [file ee41fb798413d7ee0e8bf0e6.docx]

# ANNEX 1: QUESTIONNAIRRE

# Title: Study of Incidence, Nature, Risk factors and outcome of surgical site infection in children undergoing Major surgery

Date

Patient code no

Hospital

In patient ID

Age

Sex

Name of Operation

Indication of Operation

Date of Admission

Date of Discharge

Place of work; BSMMU DMCH SSMH

# A) Nature

i) Kind of wound present?

1. Clean

Clean contaminated

Contaminated

Dirty

ii) Time indicating occurrence of infection:

3 days

5 days

7 days

10 days

iii) Kind of infection present?

Superficial

Deep incision

Organ space

# B) Risk factors

# a) Patient factors

Nutritional status

Obese

Over weight

Normal

Below average

(Estimated either by BMI/Mid arm circumference)

**b) Factors related to theatre environment**

I) clean theatre with antiseptic before and after each operation:

a) Routinely

b) Degree of contamination

c) Action on choice

ii) Anti sepsis measure for skin preparation:

Yes ( ) No ( )

If yes

How do you prepare?

a) By standard protocol

b) By choice of surgeon

c) Based on availability

iii) Surgical kits are checked for sterilization:

a) Periodically

b) Occasional

iv) Kind of surgical appliances that are used like drain tube:

1. Pre sterilized pack
2. Immediate sterilize

v) Regularly scrutinize the theatre personal:

Yes ( ) No ( )

If yes

Observation?

a) Respiratory tract infections

b) Use of ornaments (Rings, chains)

c) Proper use of mask and caps

**c.Kind of Surgical procedure undertaken**

a) Emergency

b) Elective

**d.surgery performed:**

1. With correction of risk factors
2. Without correction of risk factors

**e.Factors related to operative procedure**

a) Extensive dissection Yes ( ) No ( )

b) Prolong exposure Yes ( ) No ( )

c) Unusual bleeding Yes ( ) No ( )

d) HematomaYes ( ) No ( )

**f. Blood Transfusion during pre and intra operative period**

Yes ( ) No ( )

**gPurpose of giving antibiotics:**

1. Therapeutic
2. prophylactics

**C**). **Post operative factors;**

i) Wound surveillance;

1. Regularly

Periodic

Indication based

**D).Outcome**

i) Issues regarding antibiotics:

1. Prolongation of antibiotics use
2. Change to more costly antibiotics

ii) Prolongation of hospital stay:

a) 5 Days

b) 6-10 days

c) > 10 days
